# Supplementary material
Source: publisher figshare collection journal article supplement (https://frontiersin.figshare.com/ndownloader/files/35185858)
Supplement: Supplementary file [file 35185858]

### **Supplementary Figure Caption**

**Supplemental Figure S1.** The flow chart of the study design.

**Supplemental Figure S2.** Effects of FPG-CV on the DES-ISR. (A) The rate of DES-ISR in the groups with different FPG-CV levels. (B) The rate of DES-ISR in patients with different FPG-CV levels as sub-grouped by non-dyslipidemia and dyslipidemia. (C) The rate of DES-ISR in patients with different FPG-CV levels as sub-grouped by gender. (D) The rate of DES-ISR in patients with different BMI as sub-grouped by HbA1c levels. (E) The rate of DES-ISR in patients with different FPG-CV levels as sub-grouped by MBI. (F) The rate of DES-ISR in patients with different FPG-CV levels as sub-grouped by CRP levels. \* $P < 0.05$ , \*\* $P < 0.01$  comparison among S1-S4 groups; # $P < 0.05$  comparison between subgroups; ns = not significant.
